# Supplementary material for: Hierarchical NiMoO4nanowire arrays supported on macroporous graphene foam as binder-free 3D anodes for high-performance lithium storage
Source: Royal Society of Chemistry journal article supplement (doi:10.1039/c5cp04820f), 2015-11-17
Supplement: c5cp04820f1.pdf [file c5cp04820f1.pdf]

Electronic Supplementary Material (ESI) for Physical Chemistry Chemical Physics.

## Supporting Information

Hierarchical NiMoO<sub>4</sub> nanowire arrays supported on  
macroporous graphene foam as binder-free 3D anodes for high-  
performance lithium storage

Bo Wang, Songmei Li,\* Xiaoyu Wu, Jianhua Liu, and Wenming Tian

Key Laboratory of Aerospace Advanced Materials and Performance of Ministry of  
Education, School of Materials Science and Engineering, Beihang University, Beijing,  
100191, P. R. China

\* Corresponding author. Tel: +86 10 82317103; fax: +86 10 82317103.

E-mail address: songmei\_li@buaa.edu.cn.

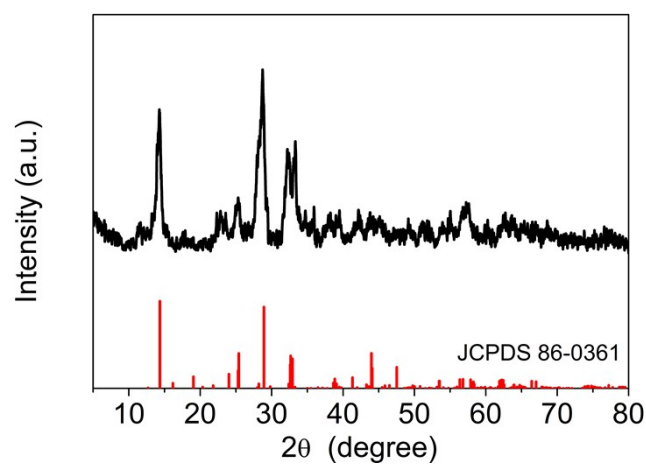

**Fig. S1** The XRD pattern of the  $\text{NiMoO}_4$  nanowires powders.

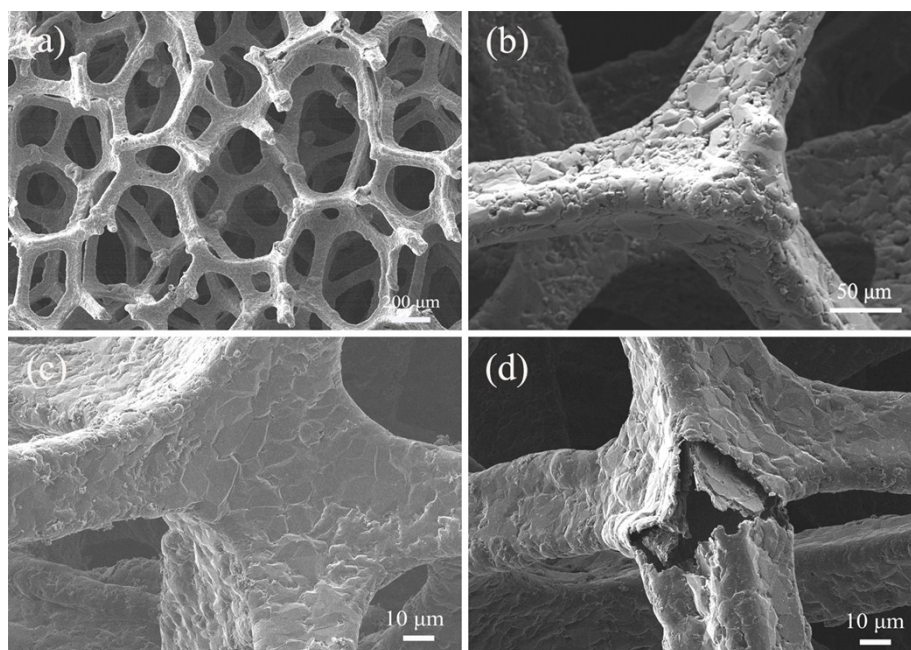

**Fig. S2** (a-c) SEM images of the as-prepared 3DGF after etching of Ni foam at different magnifications. (d) a typical graphene micro-tube, which is one part of the 3D graphene foam by partially broken during the preparation process.

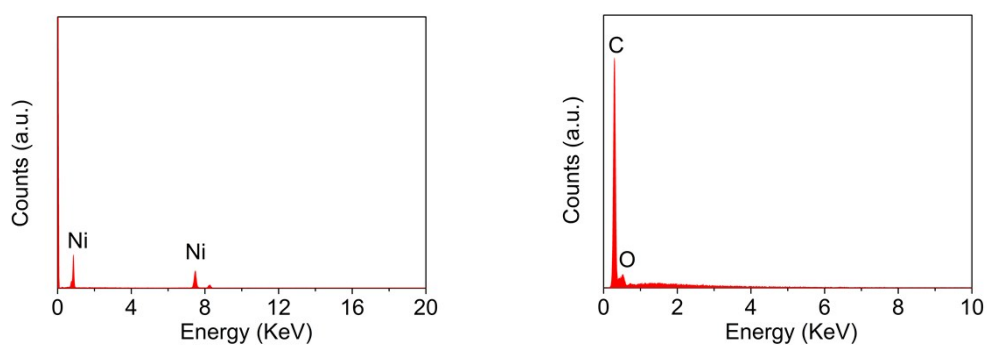

**Fig. S3** EDS spectrum of (a) Ni foam and (b) as-prepared 3DGF.

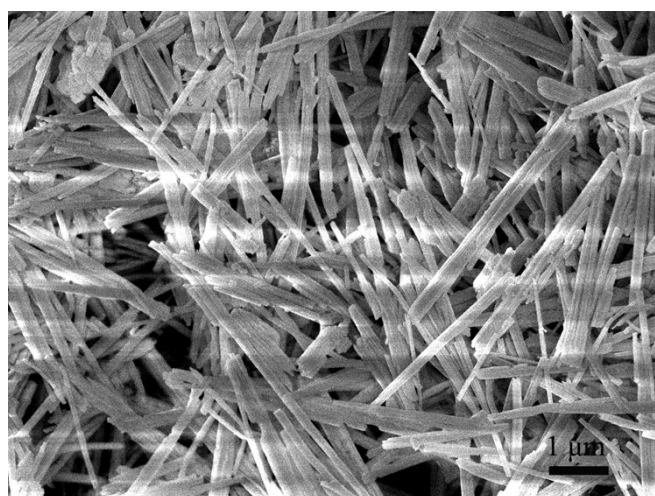

**Fig. S4** SEM images of the NiMoO<sub>4</sub> nanowires powders.

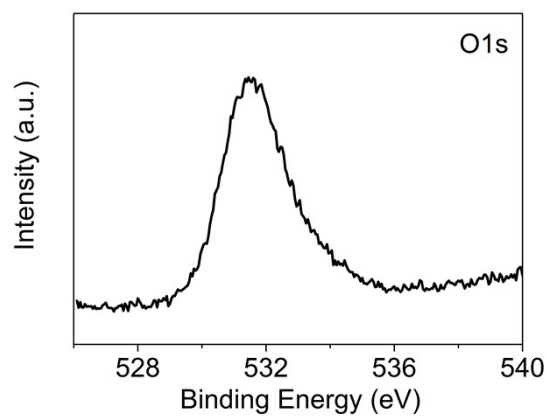

**Fig. S5** XPS spectra of O 1s for NiMoO<sub>4</sub> NWAs/3DGF composites.
